# Supplementary material for: Nanostructured Cd2SnO4as an energy harvesting photoanode for solar water splitting
Source: Royal Society of Chemistry journal article supplement (doi:10.1039/c2ee03042j), 2011-12-19
Supplement: c2ee03042j.pdf [file c2ee03042j.pdf]

# Nanostructured $\text{Cd}_2\text{SnO}_4$ as Energy Harvesting Photoanode for Solar Water Splitting

## Supplementary Information

5

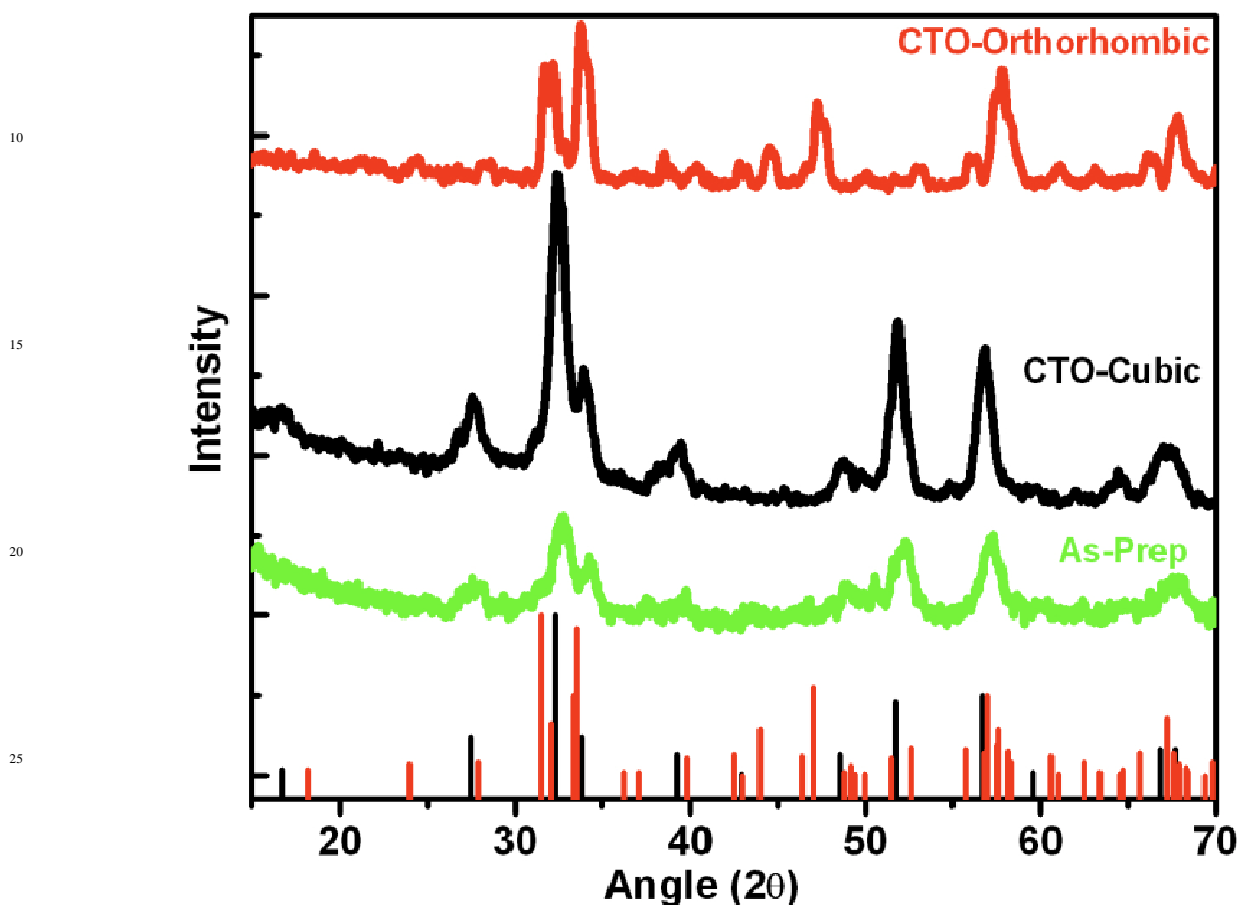

S1: X-ray diffraction pattern of 'As-prepared' sample, Cubic  $\text{Cd}_2\text{SnO}_4$  nanoparticles and Orthorhombic  $\text{Cd}_2\text{SnO}_4$  nanoparticles

35

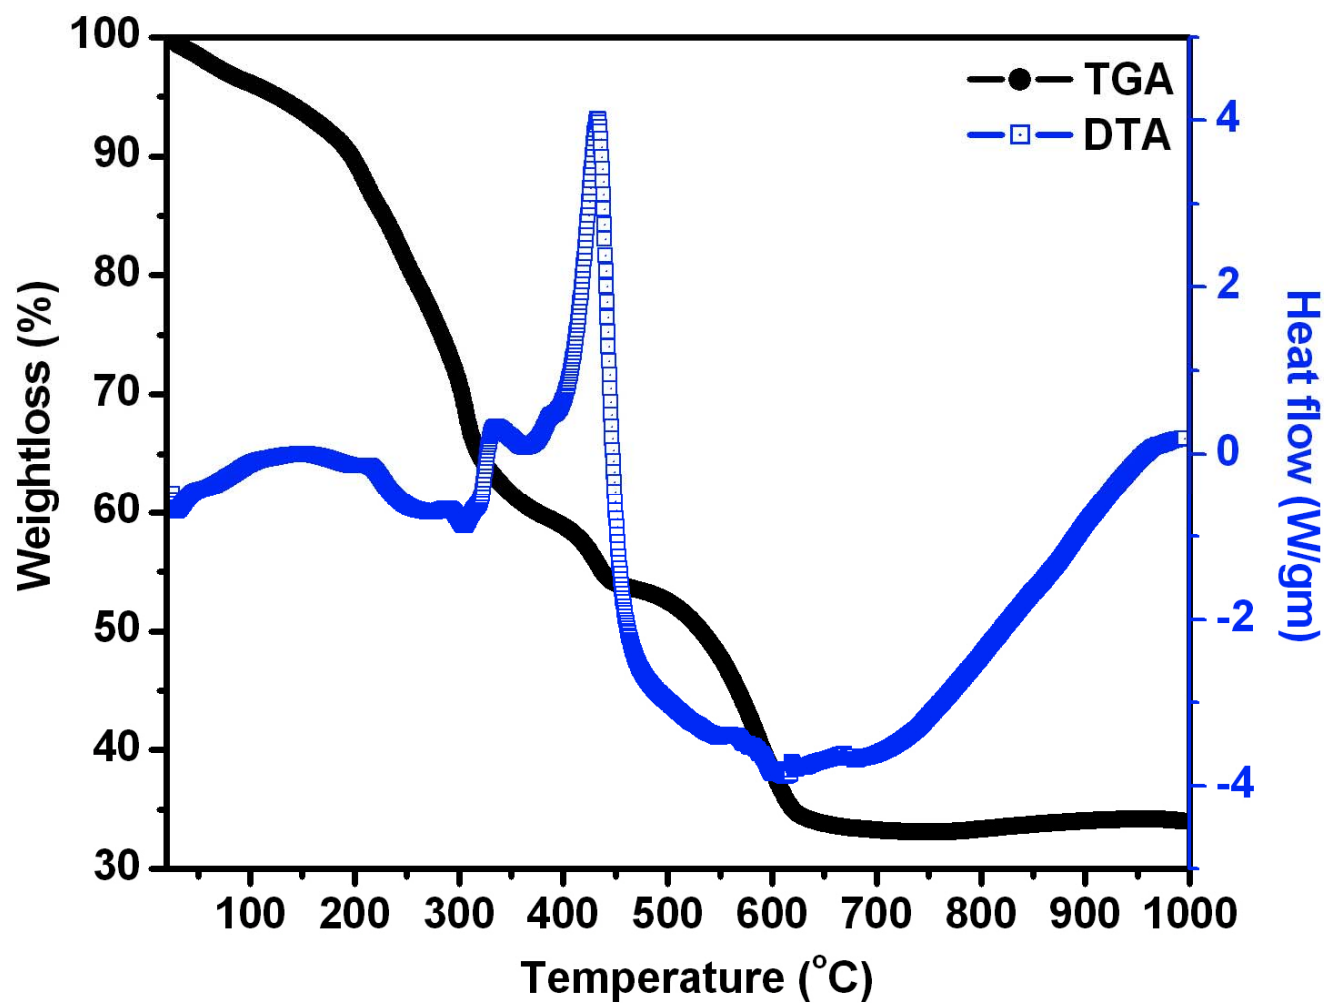

S2: Thermogravimetry data of dry gel obtained just before the combustion synthesis

5

10

15

5

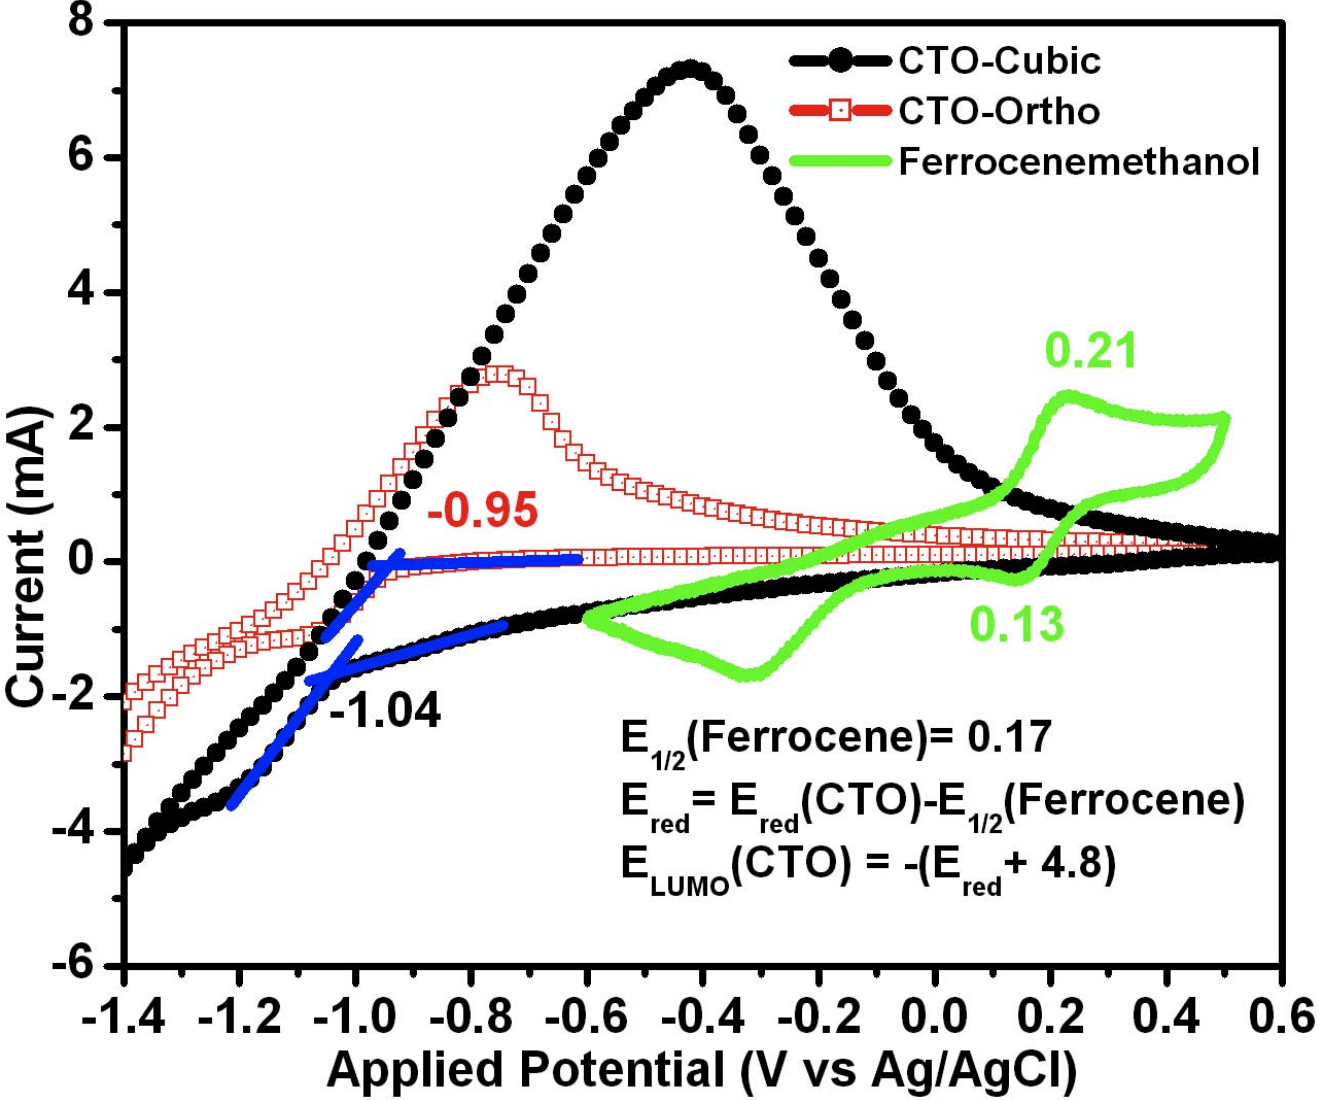

10

S3: Cyclic Voltammetry of Cd<sub>2</sub>SnO<sub>4</sub> films in 1M NaOH

15

a

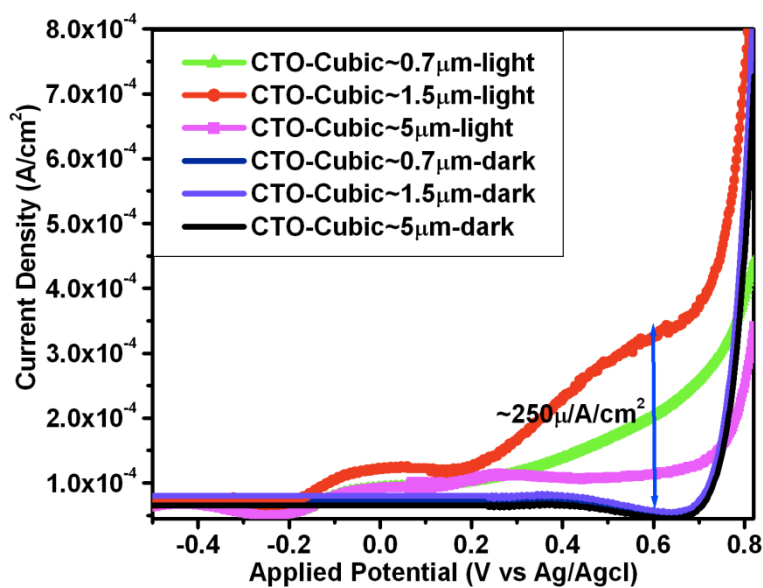

b

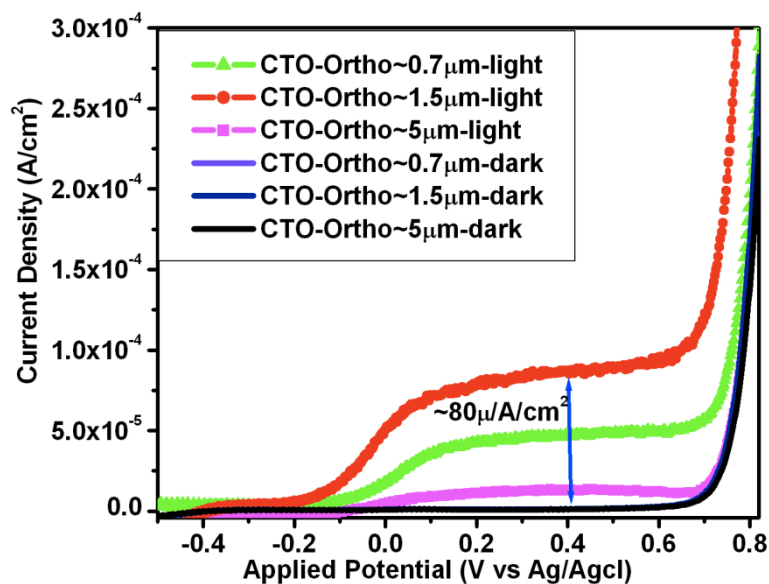

5

#### S4: Effect of thickness variation of cubic and orthorhombic $\text{Cd}_2\text{SnO}_4$ films on the photoelectrochemical performance

10

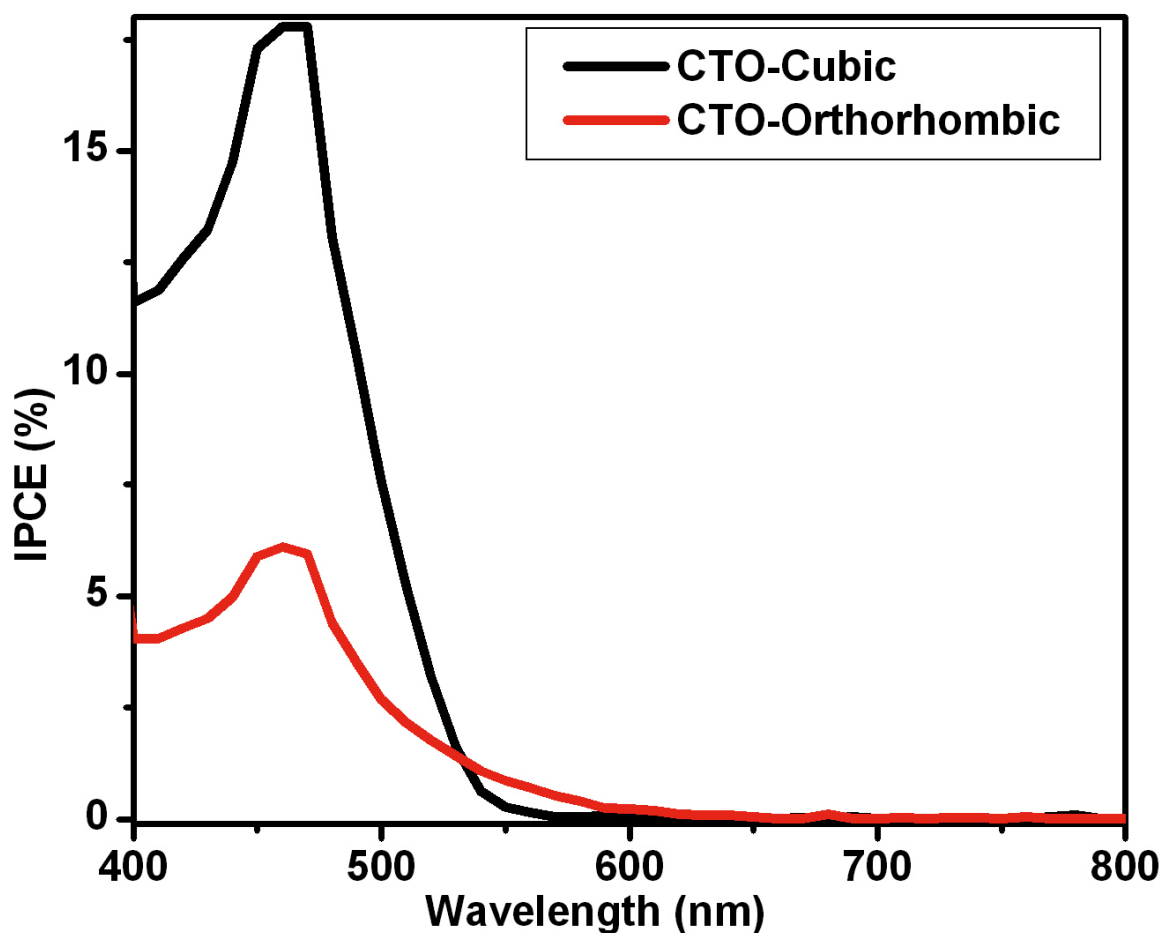

**S5:** IPCE data of cubic and orthorhombic  $\text{Cd}_2\text{SnO}_4$  films (for reference measurements on P25- $\text{TiO}_2$ )

5

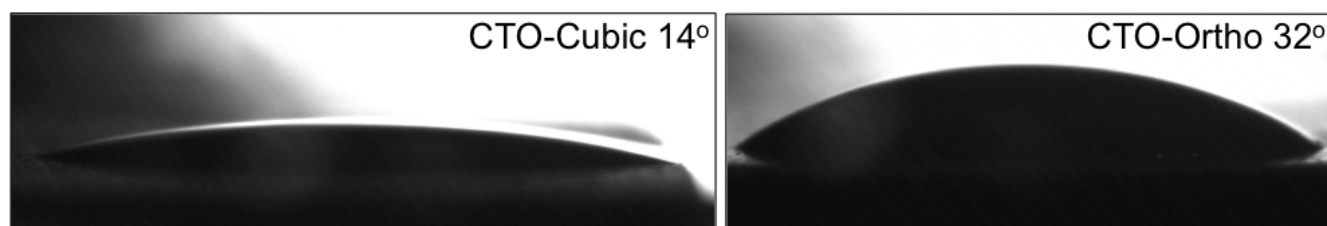

**S6:** Water contact angle measurement of cubic and orthorhombic  $\text{Cd}_2\text{SnO}_4$  films

10

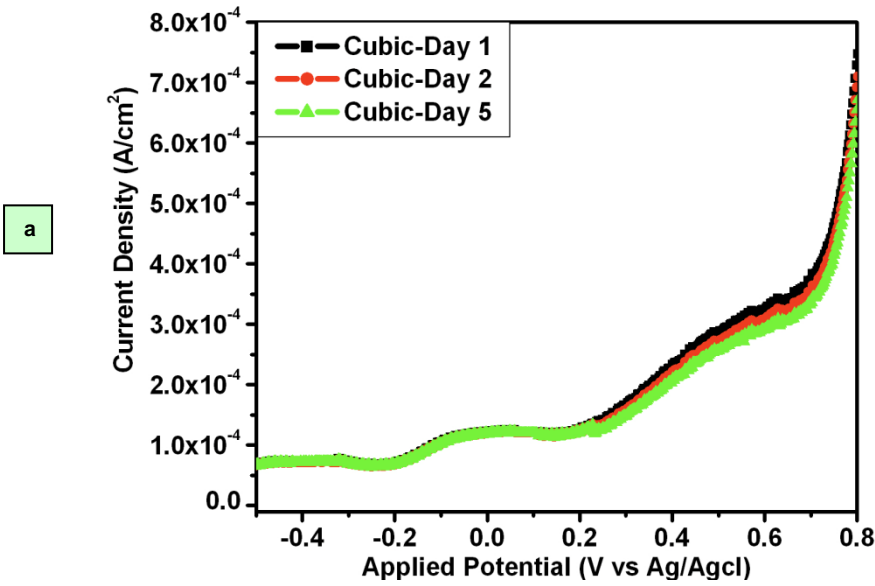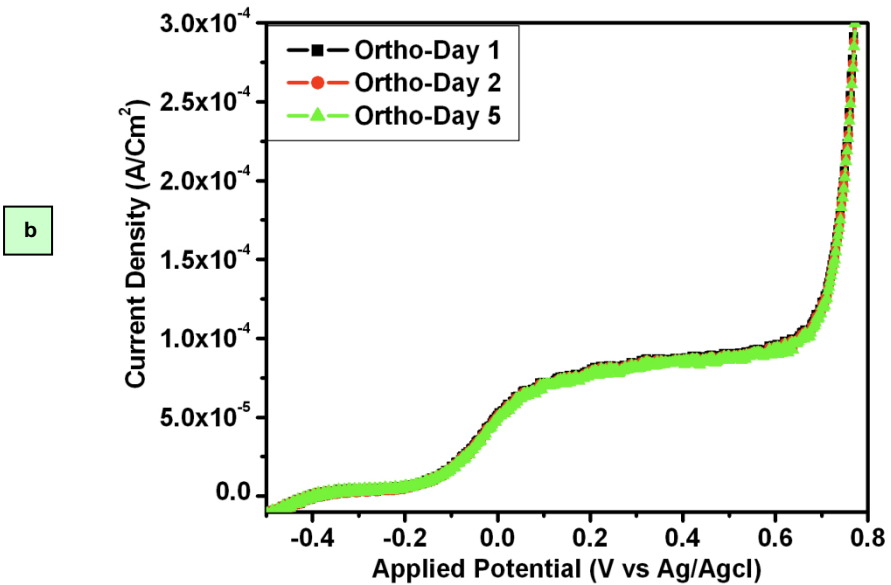

S7: Stability data of cubic and orthorhombic  $Cd_2SnO_4$  films
